# Supplementary material for: Comprehensive Genomic Characterization of Fifteen Early-Onset Lynch-Like Syndrome Colorectal Cancers
Source: PubMed Central journal article supplement (PMC7999079; doi:10.3390/cancers13061259), 2021-03-12
Supplement: cancers-13-01259-s001.pdf [file cancers-13-01259-s001.pdf]

# Supplementary Materials: Comprehensive Genomic Characterization of Fifteen Early-Onset Lynch-Like Syndrome Colorectal Cancers

Mariano Golubicki, Marcos Díaz-Gay, Laia Bonjoch, Sebastià Franch-Expósito, Jenifer Muñoz, Miriam Cuatrecasas, Teresa Ocaña, Soledad Iseas, Guillermo Mendez, Marcela Carballido, Juan Robbio, Daniel Cisterna, Enrique Roca, Antoni Castells, Francesc Balaguer, Sergi Castellví-Bel and Marina Antelo

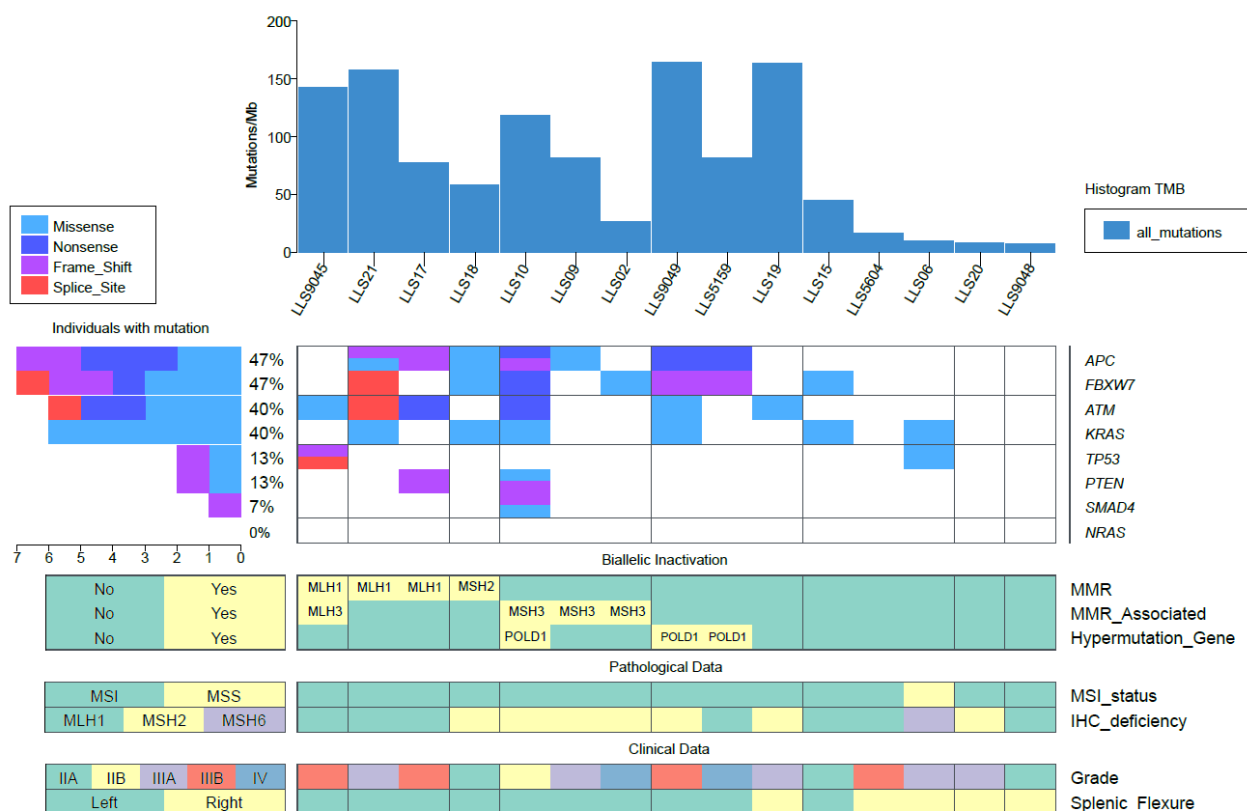

**Figure S1.** Additional most common somatic mutated genes in colorectal cancer.

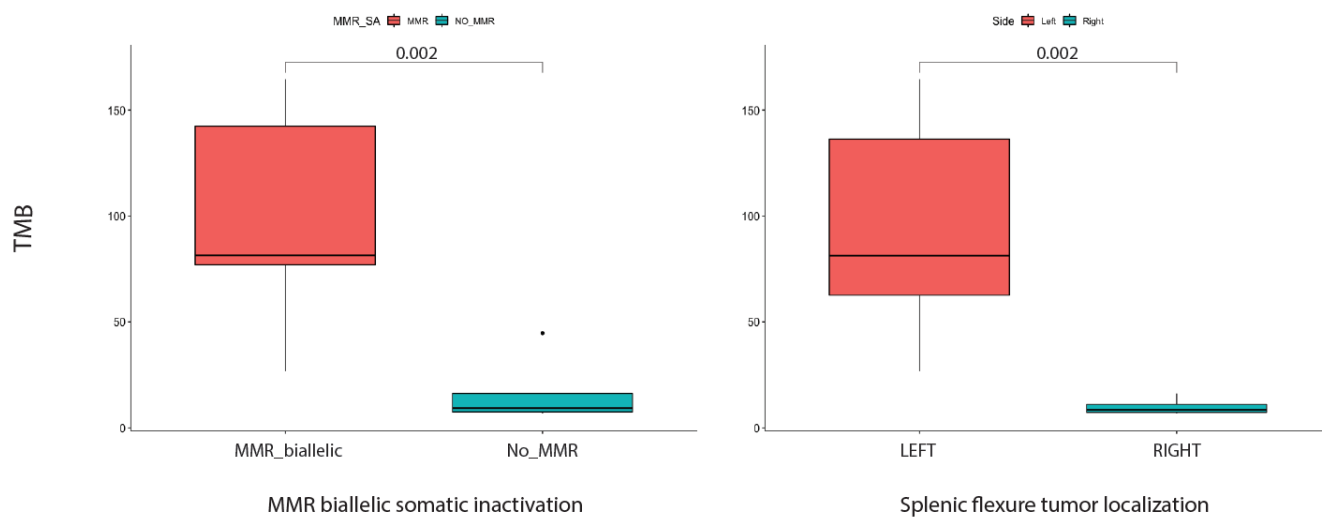

**Figure S2.** TMB comparison between biallelic somatic inactivations patients and with those who are not biallelic inactivated.

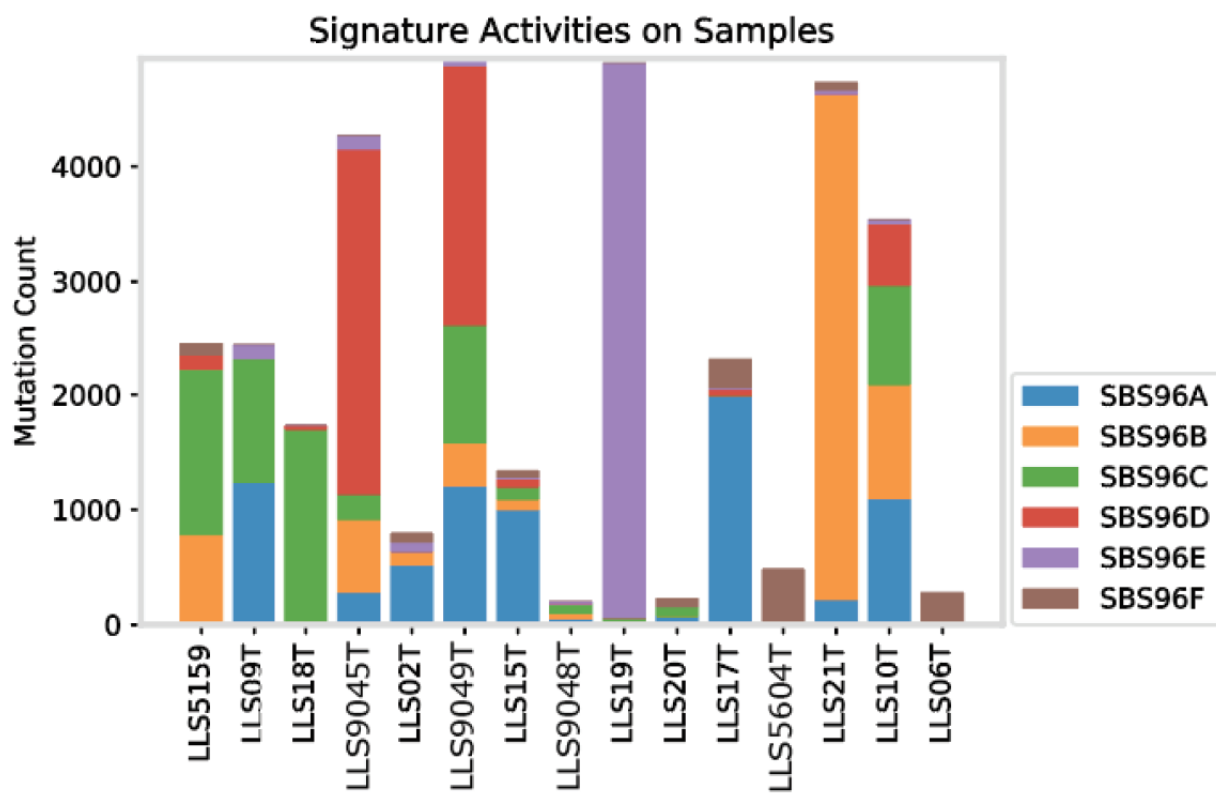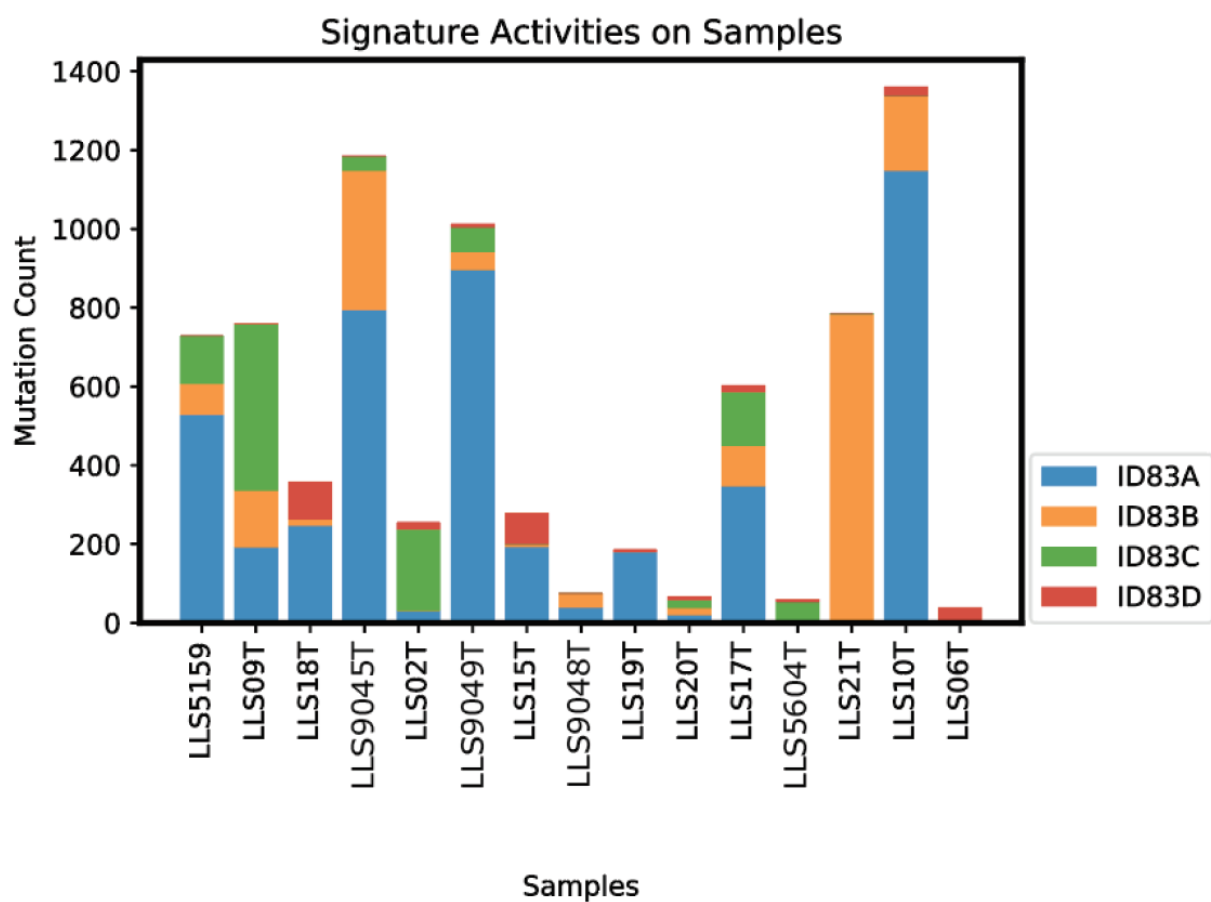

Figure S3. Single Base Substitution and InDels De novo mutational signatures.

**Table S1.** CRC Patients from CBioPortal with MSH3 truncating variants and no other MMR alterations showing microsatellite instability.

| SAMPLE ID               | STUDY ORIGIN IN CBIOPORTAL                          | MSH3 VARIANTS | ANNOTATION                                                                                              | MSI STATUS | MUTATION COUNT |
|-------------------------|-----------------------------------------------------|---------------|---------------------------------------------------------------------------------------------------------|------------|----------------|
| 11CO033                 | Colon Cancer (CPTAC-2 Prospective, Cell 2019)       | K383Rfs*32    | OncoKB: Likely Oncogenic, level NA;QVIC: NA;MyCancerGenome: not present;CancerHotspot: no;3DHotspot: no | MSI        | 1810           |
| 11CO036                 | Colon Cancer (CPTAC-2 Prospective, Cell 2019)       | S1022*        | OncoKB: Likely Oncogenic, level NA;QVIC: NA;MyCancerGenome: not present;CancerHotspot: no;3DHotspot: no | MSI        | 1805           |
| 11CO061                 | Colon Cancer (CPTAC-2 Prospective, Cell 2019)       | K383Rfs*32    | OncoKB: Likely Oncogenic, level NA;QVIC: NA;MyCancerGenome: not present;CancerHotspot: no;3DHotspot: no | MSI        | 736            |
| TCGA-AA-A00A            | Colorectal Adenocarcinoma (TCGA, Nature 2012)       | K381Gfs*20    | OncoKB: Likely Oncogenic, level NA;QVIC: NA;MyCancerGenome: not present;CancerHotspot: no;3DHotspot: no | MSI        | 324            |
| TCGA-AA-A01Q            | Colorectal Adenocarcinoma (TCGA, Nature 2012)       | K381Gfs*20    | OncoKB: Likely Oncogenic, level NA;QVIC: NA;MyCancerGenome: not present;CancerHotspot: no;3DHotspot: no | MSI        | 595            |
| TCGA-AA-3492            | Colorectal Adenocarcinoma (TCGA, PanCancer Atlas)   | N861Mfs*6     | OncoKB: Likely Oncogenic, level NA;QVIC: NA;MyCancerGenome: not present;CancerHotspot: no;3DHotspot: no | MSI        | no data        |
| TCGA-AA-3663            | Colorectal Adenocarcinoma (TCGA, PanCancer Atlas)   | N1020Ifs*40   | OncoKB: Likely Oncogenic, level NA;QVIC: NA;MyCancerGenome: not present;CancerHotspot: no;3DHotspot: no | no data    | 1937           |
| coadread_dfci_2016_60   | Colorectal Adenocarcinoma (DFCI, Cell Reports 2016) | K383Rfs*32    | OncoKB: Likely Oncogenic, level NA;QVIC: NA;MyCancerGenome: not present;CancerHotspot: no;3DHotspot: no | MSI        | 1257           |
| coadread_dfci_2016_116  | Colorectal Adenocarcinoma (DFCI, Cell Reports 2016) | Q1058*        | OncoKB: Likely Oncogenic, level NA;QVIC: NA;MyCancerGenome: not present;CancerHotspot: no;3DHotspot: no | MSS        | 4474           |
| coadread_dfci_2016_261  | Colorectal Adenocarcinoma (DFCI, Cell Reports 2016) | K383Rfs*32    | OncoKB: Likely Oncogenic, level NA;QVIC: NA;MyCancerGenome: not present;CancerHotspot: no;3DHotspot: no | MSI        | 1062           |
| coadread_dfci_2016_407  | Colorectal Adenocarcinoma (DFCI, Cell Reports 2016) | K383Rfs*32    | OncoKB: Likely Oncogenic, level NA;QVIC: NA;MyCancerGenome: not present;CancerHotspot: no;3DHotspot: no | MSI        | 535            |
| coadread_dfci_2016_1212 | Colorectal Adenocarcinoma (DFCI, Cell Reports 2016) | K383Rfs*32    | OncoKB: Likely Oncogenic, level NA;QVIC: NA;MyCancerGenome: not present;CancerHotspot: no;3DHotspot: no | MSI        | 1739           |
| coadread_dfci_2016_2227 | Colorectal Adenocarcinoma (DFCI, Cell Reports 2016) | X303_splice   | OncoKB: Likely Oncogenic, level NA;QVIC: NA;MyCancerGenome: not present;CancerHotspot: no;3DHotspot: no | MSI        | 588            |

**Table S2.** Comparative studies showing clinical and molecular differences in published cohorts.

| Author         | year | Number of CRC LLS patients | Mean age at CRC diagnosis (years old) | Patients with double somatic alterations in MMR genes (%) of total cohort | Number of patients with CRC≤40 | Mean age at CRC diagnosis (years old) | Patients with Double somatic alterations in MMR genes (%) of patients with CRC≤40 |
|----------------|------|----------------------------|---------------------------------------|---------------------------------------------------------------------------|--------------------------------|---------------------------------------|-----------------------------------------------------------------------------------|
| Sourouille     | 2013 | 17                         | 54                                    | 24%                                                                       | 3                              | 28                                    | 0%                                                                                |
| Haraldsottir   | 2014 | 15                         | 54                                    | 93%                                                                       | 4                              | 34                                    | 100%                                                                              |
| Mensenkamp     | 2014 | 23                         | 47                                    | 48%                                                                       | 5                              | 33                                    | 60%                                                                               |
| Geurts-Giele W | 2014 | 33                         | 55                                    | 51%                                                                       | 5                              | 35                                    | 0%                                                                                |
| Porkka         | 2019 | 14                         | 65                                    | 79%                                                                       | 1                              | 38                                    | 100%                                                                              |
| Xicola         | 2019 | 11                         | 63                                    | 54%                                                                       | 0                              | -                                     | -                                                                                 |
| Golubicki      | 2020 | 15                         | 30                                    | 33%                                                                       | 15                             | 30                                    | 33%                                                                               |

Table S3. Additional quality sequencing data from Table 2 variants.

| Sample ID                           | Gene name    | HGVS,c      | HGVS,p       | Variant impact     | TumorAD | TumorDP | Tumor AF |
|-------------------------------------|--------------|-------------|--------------|--------------------|---------|---------|----------|
| <b>Biallelic somatic variants</b>   |              |             |              |                    |         |         |          |
| LLS02                               | <i>MSH3</i>  | c.423C>A    | p.Cys141*    | stop_gained        | 4,6     | 10      | 0,6      |
| LLS09                               | <i>MSH3</i>  | c.1148delA  | p.Lys383fs   | frameshift_variant | 7,6     | 13      | 0,4615   |
| LLS10                               | <i>MSH3</i>  | c.1148delA  | p.Lys383fs   | frameshift_variant | 28,43   | 71      | 0,6056   |
| LLS10                               | <i>POLD1</i> | c.583C>T    | p.Arg195*    | stop_gained        | 119,68  | 187     | 0,3636   |
| LLS10                               | <i>POLD1</i> | c.2959delG  | p.Asp987fs   | frameshift_variant | 85,56   | 141     | 0,3972   |
| LLS17                               | <i>MLH1</i>  | c.129dupA   | p.Ser44fs    | frameshift_variant | 25,7    | 32      | 0,2188   |
| LLS17                               | <i>MLH1</i>  | c.1831delA  | p.Ile611fs   | frameshift_variant | 52,26   | 78      | 0,3333   |
| LLS18                               | <i>MSH2</i>  | c.2251G>T   | p.Gly751*    | stop_gained        | 87,15   | 102     | 0,1471   |
| LLS18                               | <i>MSH2</i>  | c.2634+1G>A | -            | splice_variant     | 73,17   | 90      | 0,1889   |
| LLS21                               | <i>MLH1</i>  | c.199G>A    | p.Gly67Arg   | missense_variant   | 129,2   | 149     | 0,1342   |
| LLS21                               | <i>MLH1</i>  | c.602delT   | p.Val201fs   | frameshift_variant | 134,43  | 177     | 0,2429   |
| LLS5159                             | <i>POLD1</i> | c.1562G>A   | p.Arg521Gln  | missense_variant   | 80,23   | 103     | 0,2233   |
| LLS5159                             | <i>POLD1</i> | c.3047G>A   | p.Arg1016His | missense_variant   | 57,21   | 78      | 0,2692   |
| LLS9045                             | <i>MLH3</i>  | c.3694C>T   | p.Arg1232Cys | missense_variant   | 55,22   | 77      | 0,2857   |
| LLS9045                             | <i>MLH3</i>  | c.1924T>C   | p.Phe642Leu  | missense_variant   | 37,32   | 69      | 0,4638   |
| LLS9045                             | <i>MLH1</i>  | c.588delA   | p.Lys196fs   | frameshift_variant | 25,7    | 32      | 0,2188   |
| LLS9045                             | <i>MLH1</i>  | c.1489delC  | p.Arg497fs   | frameshift_variant | 119,32  | 151     | 0,2119   |
| LLS9049                             | <i>POLD1</i> | c.2959delG  | p.Asp987fs   | frameshift_variant | 50,22   | 72      | 0,3056   |
| <b>Monoallelic somatic variants</b> |              |             |              |                    |         |         |          |
| LLS09                               | <i>MSH6</i>  | c.3552G>A   | p.Met1184Ile | missense_variant   | 19,8    | 27      | 0,2963   |
| LLS10                               | <i>MSH6</i>  | c.2875C>T   | p.Arg959Cys  | missense_variant   | 76,4    | 116     | 0,3448   |
| LLS10                               | <i>POLE</i>  | c.2091delC  | p.Leu698fs   | frameshift_variant | 88,33   | 121     | 0,2727   |
| LLS18                               | <i>MSH6</i>  | c.3261dupC  | p.Phe1088fs  | frameshift_variant | 324,47  | 371     | 0,1267   |
| LLS19                               | <i>MSH2</i>  | c.1225C>T   | p.Gln409*    | stop_gained        | 63,12   | 75      | 0,16     |
| LLS19                               | <i>MSH6</i>  | c.1993G>A   | p.Glu665Lys  | missense_variant   | 108,15  | 123     | 0,122    |
| LLS21                               | <i>MSH3</i>  | c.3356T>C   | p.Leu1119Pro | missense_variant   | 30,5    | 35      | 0,1429   |
| LLS21                               | <i>PMS2</i>  | c.1239delA  | p.Asp414fs   | frameshift_variant | 64,16   | 80      | 0,2      |
| LLS21                               | <i>POLE</i>  | c.1060A>G   | p.Thr354Ala  | missense_variant   | 49,12   | 61      | 0,1967   |
| LLS9045                             | <i>MUTYH</i> | c.724C>T    | p.Arg242Cys  | missense_variant   | 58,33   | 91      | 0,3626   |
| LLS9045                             | <i>POLD1</i> | c.735G>T    | p.Glu245Asp  | missense_variant   | 73,27   | 100     | 0,27     |
| LLS9049                             | <i>MUTYH</i> | c.544C>T    | p.Arg182Trp  | missense_variant   | 99,15   | 114     | 0,1316   |
| LLS9049                             | <i>MSH3</i>  | c.433G>T    | p.Ala145Ser  | missense_variant   | 51,9    | 60      | 0,15     |
| LLS9049                             | <i>POLE</i>  | c.3176G>A   | p.Arg1059His | missense_variant   | 97,24   | 121     | 0,1983   |

**Table S4.** Insight database classification from somatic MMR variants in Table 2.

| InSight Classification for MMR variants |             |             |              |                            |
|-----------------------------------------|-------------|-------------|--------------|----------------------------|
| Biallelic Somatic Variants              |             |             |              |                            |
| Patient ID                              | Gene Name   | HGVS.c      | HGVS.p       | InSight Classification     |
| LLS17                                   | <i>MLH1</i> | c.129dupA   | p.Ser44fs    | not present                |
| LLS17                                   | <i>MLH1</i> | c.1831delA  | p.Ile611fs   | Class 5: Pathogenic        |
| LLS18                                   | <i>MSH2</i> | c.2251G>T   | p.Gly751*    | not present                |
| LLS18                                   | <i>MSH2</i> | c.2634+1G>T | -            | Class 4: Likely Pathogenic |
| LLS21                                   | <i>MLH1</i> | c.199G>A    | p.Gly67Arg   | Class 5: Pathogenic        |
| LLS21                                   | <i>MLH1</i> | c.602delT   | p.Val201fs   | not present                |
| LLS9045                                 | <i>MLH1</i> | c.588delA   | p.Lys196fs   | Class 5: Pathogenic        |
| LLS9045                                 | <i>MLH1</i> | 1849delC    | p.Arg497fs   | not present                |
| Monoallelic Somatic Variants            |             |             |              |                            |
| Patient ID                              | Gene Name   | HGVS.c      | HGVS.p       | InSight Classification     |
| LLS09                                   | <i>MSH6</i> | c.3552G>A   | p.Met1184Ile | not present                |
| LLS10                                   | <i>MSH6</i> | c.2875C>T   | p.Arg959Cys  | not present                |
| LLS18                                   | <i>MSH6</i> | c.3261dupC  | p.Phe1088fs  | Class 5: Pathogenic        |
| LLS19                                   | <i>MSH2</i> | c.1225C>T   | p.Gln409*    | not present                |
| LLS19                                   | <i>MSH6</i> | c.1993G>A   | p.Glu665Lys  | not present                |
| LLS21                                   | <i>PMS2</i> | c.1239delA  | p.Asp414fs   | not present                |

**Table S5.** ACMG classification criteria from Table 2 somatic variants.

| Biallelic somatic variants   |              |             |              |                    |             |                   |             |                                                |
|------------------------------|--------------|-------------|--------------|--------------------|-------------|-------------------|-------------|------------------------------------------------|
| Sample ID                    | Gene name    | HGVS.c      | HGVS.p       | Variant impact     | gnomAD      | ClinVar           | COSMIC      | ACMG classification criteria                   |
| LLS02                        | <i>MSH3</i>  | c.423C>A    | p.Cys141*    | stop_gained        | not present | not present       | not present | Pathogenic (PVS1; PMS2; PP3)                   |
| LLS09                        | <i>MSH3</i>  | c.1148delA  | p.Lys383fs   | frameshift_variant | 1,64E-05    | Pathogenic        | COSM1438888 | Pathogenic (PVS1; PS3; PP3; PP5)               |
| LLS10                        | <i>MSH3</i>  | c.1148delA  | p.Lys383fs   | frameshift_variant | 1,64E-05    | Pathogenic        | COSM1438888 | Pathogenic (PVS1; PS3; PP3; PP5)               |
| LLS10                        | <i>POLD1</i> | c.583C>T    | p.Arg195*    | stop_gained        | 0,0000647   | Conflicting       | not present | Benign (PVS1; PP3; BS1; BS2)                   |
| LLS10                        | <i>POLD1</i> | c.2959delG  | p.Asp987fs   | frameshift_variant | 0,000057209 | not present       | COSM3686158 | Likely Pathogenic (PVS1; PM2)                  |
| LLS17                        | <i>MLH1</i>  | c.129dupA   | p.Ser44fs    | frameshift_variant | not present | Pathogenic        | not present | Pathogenic (PVS1; PM2; PP3; PP5)               |
| LLS17                        | <i>MLH1</i>  | c.1831delA  | p.Ile611fs   | frameshift_variant | not present | not present       | not present | Pathogenic (PVS1; PM2; PP3)                    |
| LLS18                        | <i>MSH2</i>  | c.2251G>T   | p.Gly751*    | stop_gained        | not present | not present       | not present | Pathogenic (PVS1; PM2; PP3)                    |
| LLS18                        | <i>MSH2</i>  | c.2634+1G>A | -            | splice_variant     | not present | Likely_pathogenic | not present | Pathogenic (PVS1; PM2; PP3; PP5)               |
| LLS21                        | <i>MLH1</i>  | c.199G>A    | p.Gly67Arg   | missense_variant   | not present | Pathogenic        | COSM1422567 | Pathogenic (PS1; PM1; PM2; PM5; PP2; PP3; PP5) |
| LLS21                        | <i>MLH1</i>  | c.602delT   | p.Val201fs   | frameshift_variant | not present | not present       | not present | Likely Pathogenic (PVS1; PM2)                  |
| LLS159                       | <i>POLD1</i> | c.1562G>A   | p.Arg521Gln  | missense_variant   | 0,000126296 | VUS               | not present | Benign (PP3; BS1; BS2; BP1)                    |
| LLS159                       | <i>POLD1</i> | c.3047G>A   | p.Arg1016His | missense_variant   | not present | VUS               | COSM7587416 | VUS (PM2; PP3; BP1)                            |
| LLS9045                      | <i>MLH3</i>  | c.3694C>T   | p.Arg1232Cys | missense_variant   | 3,25E-05    | VUS               | not present | VUS (PP3; BP1)                                 |
| LLS9045                      | <i>MLH3</i>  | c.1924T>C   | p.Phe642Leu  | missense_variant   | not present | not present       | not present | Likely Benign (PM2; BP1; BP4)                  |
| LLS9045                      | <i>MLH1</i>  | c.588delA   | p.Lys196fs   | frameshift_variant | 4,06E-06    | Pathogenic        | not present | Pathogenic (PVS1; PM2; PP3; PP5)               |
| LLS9045                      | <i>MLH1</i>  | c.1489delC  | p.Arg497fs   | frameshift_variant | 4,06E-06    | not present       | COSM1422596 | Pathogenic (PVS1; PM2; PP3; PP5)               |
| LLS9049                      | <i>POLD1</i> | c.2959delG  | p.Asp987fs   | frameshift_variant | 0,000057209 | not present       | COSM3686158 | Likely Pathogenic (PVS1; PM2)                  |
| Monoallelic somatic variants |              |             |              |                    |             |                   |             |                                                |
| Sample ID                    | Gene name    | HGVS.c      | HGVS.p       | Variant impact     | gnomAD      | ClinVar           | COSMIC      | ACMG classification criteria                   |
| LLS09                        | <i>MSH6</i>  | c.3552G>A   | p.Met1184Ile | missense_variant   | 4,07E-06    | not present       | not present | VUS (PM2; PP3)                                 |
| LLS10                        | <i>MSH6</i>  | c.2875C>T   | p.Arg959Cys  | missense_variant   | 1,22E-05    | VUS               | not present | VUS (PM2; PP3)                                 |
| LLS10                        | <i>POLE</i>  | c.2091delC  | p.Leu698fs   | frameshift_variant | 8,21E-06    | VUS               | COSM4612998 | Pathogenic (PVS1; PM2; PP3)                    |
| LLS18                        | <i>MSH6</i>  | c.3261dupC  | p.Phe1088fs  | frameshift_variant | 0,00003449  | Pathogenic        | COSM13394   | Pathogenic (PVS1; PM2; PP3; PP5)               |
| LLS19                        | <i>MSH2</i>  | c.1225C>T   | p.Gln409*    | stop_gained        | not present | Pathogenic        | COSM7508782 | Pathogenic (PVS1; PM2; PP3; PP5)               |
| LLS19                        | <i>MSH6</i>  | c.1993G>A   | p.Glu665Lys  | missense_variant   | 4,07E-06    | not present       | not present | VUS (PM2; PP3)                                 |
| LLS21                        | <i>MSH3</i>  | c.3356T>C   | p.Leu119Pro  | missense_variant   | not present | not present       | not present | VUS (PM2; PP3)                                 |
| LLS21                        | <i>PMS2</i>  | c.1239delA  | p.Asp414fs   | frameshift_variant | not present | not present       | COSM150905  | Pathogenic (PVS1; PM2; PP3)                    |
| LLS21                        | <i>POLE</i>  | c.1060A>G   | p.Thr354Ala  | missense_variant   | not present | not present       | not present | Likely Benign (PM2; BP1; BP4)                  |
| LLS9045                      | <i>MUTYH</i> | c.724C>T    | p.Arg242Cys  | missense_variant   | 5,30E-05    | Pathogenic        | COSM6954579 | Pathogenic (PM1; PM2; PM5; PP2; PP3; PP5)      |
| LLS9045                      | <i>POLD1</i> | c.735G>T    | p.Glu245Asp  | missense_variant   | not present | not present       | not present | Likely Benign (PM2; BP1; BP4)                  |
| LLS9049                      | <i>MUTYH</i> | c.544C>T    | p.Arg182Trp  | missense_variant   | 1,22E-05    | not present       | COSM6922477 | Pathogenic (PM1; PM2; PM5; PP2; PP3; PP5)      |
| LLS9049                      | <i>MSH3</i>  | c.433G>T    | p.Ala145Ser  | missense_variant   | not present | VUS               | not present | VUS (PM2; BP4)                                 |
| LLS9049                      | <i>POLE</i>  | c.3176G>A   | p.Arg1059His | missense_variant   | 1,22E-05    | not present       | COSM6965827 | VUS (PM2; PP3; BP1)                            |
